# Supplementary material for: Too packed to change: side-chain packing and site-specific substitution rates in protein evolution
Source: PeerJ. 2015 Apr 23;3:e911. doi: 10.7717/peerj.911 (PMC4411540; doi:10.7717/peerj.911)
Supplement: Table S1 — Correlation coefficients for all proteins. [file peerj-03-911-s001.xlsx]

## Sheet: Supplementary Table 1.csv
Protein-by-protein correlation between empirical substitution rates and structural properties
# cor.x = pearson correlation of KR4S with variable x
# cor.p.x = p-value of cor.x
# sp.x.y = semipartial correlation of KR4S with x, given y
# c = rho, a = alpha (e.g. cca is WCN_{rho}^{alpha rho})
# rsa = RSA
pdb	chain	cor.cca	cor.p.cca	cor.aac	cor.p.aac	cor.cc	cor.p.cc	cor.aa	cor.p.aa	cor.rsa	cor.p.rsa	sp.cca.aac	sp.p.cca.aac	sp.cca.cc	sp.p.cca.cc	sp.cca.aa	sp.p.cca.aa	sp.cca.rsa	sp.p.cca.rsa	sp.aac.cca	sp.p.aac.cca	sp.cc.cca	sp.p.cc.cca	sp.aa.cca	sp.p.aa.cca	sp.rsa.cca	sp.p.rsa.cca
132L	A	-0.681034	2.69105e-16	-0.576307	4.45976e-11	-0.667449	1.68351e-15	-0.583041	2.33758e-11	0.663049	3.10862e-15	-0.364106	5.25631e-05	-0.14497	0.129622	-0.351967	0.000100382	-0.183852	0.0530198	0.0299336	0.756733	0.0519297	0.590652	0.00324421	0.973229	0.0981201	0.307783
13PK	A	-0.674539	1.92664e-50	-0.646656	3.38584e-45	-0.677229	5.60122e-51	-0.634836	3.90267e-43	0.550474	0	-0.194577	0.000144581	-0.0168142	0.747331	-0.228084	7.19799e-06	-0.392337	3.05209e-16	-0.0319625	0.540123	-0.062594	0.229564	-0.00598655	0.908693	-0.0441211	0.397518
1A26	A	-0.694004	5.21115e-48	-0.635441	3.71172e-38	-0.697664	1.05218e-48	-0.629589	2.74798e-37	0.643451	0	-0.280124	1.63842e-07	-0.00519531	0.925723	-0.29408	3.36648e-08	-0.277914	2.08598e-07	0.024742	0.65696	-0.0715567	0.197976	0.0349753	0.530008	0.0981013	0.076911
1A2T	A	-0.628143	7.43809e-15	-0.502346	3.21694e-09	-0.632471	4.27318e-15	-0.488326	1.00611e-08	0.575593	3.30269e-12	-0.427777	2.16758e-07	-0.0223498	0.80654	-0.458402	1.60307e-08	-0.251942	0.00434614	0.201942	0.0239021	-0.0771705	0.3965	0.232445	0.00884437	0.0147825	0.871344
1A4L	A	-0.726559	2.0255e-54	-0.657314	1.86459e-41	-0.724441	5.77323e-54	-0.651957	1.35646e-40	0.671896	0	-0.315125	2.69752e-09	-0.0569206	0.30703	-0.328336	4.72746e-10	-0.289787	5.80442e-08	0.0589754	0.289839	-0.0129249	0.816858	0.0704598	0.205679	0.0867893	0.11856
1A65	A	-0.658132	8.25415e-58	-0.617459	3.62091e-49	-0.656472	1.97614e-57	-0.619699	1.30502e-49	0.668824	0	-0.228265	6.20963e-07	-0.0508243	0.27928	-0.221616	1.35324e-06	-0.1678	0.000295984	0.014909	0.751239	-0.0200073	0.670512	0.00167472	0.971597	0.205776	7.80297e-06
1A8H	A	-0.360467	1.18426e-15	-0.289757	2.08686e-10	-0.374869	6.77562e-17	-0.276357	1.46099e-09	0.360831	1.11022e-15	-0.257014	1.17065e-08	0.129469	0.00510458	-0.286694	1.37772e-10	-0.116157	0.0121322	0.141701	0.00213966	-0.165387	0.000322296	0.169206	0.000231271	0.117283	0.0113119
1A8S	A	-0.604488	1.68442e-25	-0.567096	5.401e-22	-0.612425	2.64026e-26	-0.56352	1.10865e-21	0.618264	0	-0.210039	0.000896291	0.0218657	0.735276	-0.218884	0.000524432	-0.137238	0.0322002	-0.0175588	0.78601	-0.100679	0.117722	-0.00771148	0.905101	0.188888	0.00294265
1AF7	A	-0.689063	1.58014e-37	-0.663498	5.56543e-34	-0.700406	3.19596e-39	-0.644095	1.63221e-31	0.648087	0	-0.190324	0.00200333	0.0740396	0.236712	-0.244848	5.70394e-05	-0.263132	1.38129e-05	-0.0405617	0.517645	-0.145748	0.0188794	-0.000397622	0.994944	0.120198	0.0536522
1AGM	A	-0.63834	1.05715e-50	-0.586726	3.20509e-41	-0.645809	3.15346e-52	-0.580889	2.97424e-40	0.623257	0	-0.257455	3.5463e-08	0.0315895	0.513205	-0.271559	5.30198e-09	-0.203177	1.76352e-05	0.0552531	0.252278	-0.102906	0.0323305	0.0608134	0.207507	0.149174	0.00180209
1AGY	A	-0.710529	1.37561e-27	-0.630668	2.37359e-20	-0.695111	5.24633e-26	-0.624901	6.57415e-20	0.68284	0	-0.337361	3.40054e-06	-0.164929	0.0302042	-0.344981	1.89868e-06	-0.226448	0.00258357	0.081876	0.286962	0.0743611	0.333791	0.0682814	0.375026	0.112688	0.141572
1AH7	A	-0.686067	6.37543e-33	-0.668881	8.29463e-31	-0.68803	3.57737e-33	-0.659238	1.10756e-29	0.596898	0	-0.170015	0.00981902	-0.0268314	0.68789	-0.197617	0.00255155	-0.338267	7.45474e-08	-0.0749597	0.260564	-0.0584678	0.380723	-0.0544031	0.414821	0.00487725	0.941809
1AJ0	A	-0.601402	7.27087e-27	-0.513445	8.011e-19	-0.59944	1.17105e-26	-0.509303	1.6873e-18	0.513113	0	-0.342465	5.47311e-09	-0.0512444	0.411653	-0.354677	1.28376e-09	-0.315702	1.01798e-07	0.138651	0.0250875	-0.0164327	0.792583	0.153303	0.0130575	-0.0356184	0.568504
1AK0	A	-0.71693	1.78551e-39	-0.638349	4.23934e-29	-0.719706	6.61885e-40	-0.638702	3.8669e-29	0.675653	0	-0.340239	2.22298e-08	-0.0216281	0.738047	-0.336804	3.20303e-08	-0.25474	4.65041e-05	0.0962429	0.134962	-0.0667465	0.301051	0.0859578	0.182265	0.0860868	0.181605
1AKO	A	-0.516048	3.27456e-18	-0.48437	6.18758e-16	-0.517927	2.35773e-18	-0.488508	3.21651e-16	0.562183	0	-0.178024	0.00471387	-0.0141044	0.825606	-0.168046	0.00774853	-0.0225146	0.725005	0.00127807	0.984072	-0.0462883	0.469174	-0.0239669	0.708045	0.224168	0.000326829
1AMY	A	-0.551385	1.26266e-29	-0.507255	1.30864e-24	-0.572365	2.77751e-32	-0.484184	2.89557e-22	0.525927	0	-0.216779	3.09727e-05	0.123495	0.0195519	-0.273092	1.00336e-07	-0.203045	0.000100034	0.0165985	0.755453	-0.197048	0.000162679	0.0706275	0.184044	0.11748	0.0264537
1AQ2	A	-0.744692	4.92207e-87	-0.681179	1.52067e-67	-0.745649	2.26196e-87	-0.67573	4.2206e-66	0.670301	0	-0.313265	4.17956e-13	-0.0266318	0.55821	-0.32932	1.78669e-14	-0.340218	1.84444e-15	0.0870247	0.054877	-0.0462137	0.309279	0.102449	0.0236068	0.1024	0.0236748
1AQL	A	-0.54479	6.52494e-39	-0.506645	4.73539e-33	-0.530333	1.33003e-36	-0.521209	3.34931e-35	0.52516	0	-0.203331	5.01874e-06	-0.169747	0.000153398	-0.159496	0.00038414	-0.198409	8.62928e-06	0.035153	0.439496	0.115198	0.0108123	-0.0173599	0.702772	0.13551	0.00264823
1AST	A	-0.666528	1.30063e-24	-0.587864	3.31228e-18	-0.667036	1.16537e-24	-0.57643	2.0471e-17	0.633309	0	-0.320873	6.18419e-06	-0.0395462	0.597482	-0.343801	1.03624e-06	-0.224655	0.0020987	0.0654499	0.381526	-0.0473361	0.527223	0.0788087	0.291553	0.0853821	0.252908
1B04	A	-0.54061	2.47254e-23	-0.454589	3.82396e-16	-0.533312	1.21699e-22	-0.454242	4.05127e-16	0.541775	0	-0.328131	4.24258e-09	-0.0989343	0.092689	-0.320504	1.05232e-08	-0.16204	0.00548548	0.148533	0.0110822	0.0441612	0.454724	0.129615	0.0270612	0.165887	0.00444369
1B2R	A	-0.677421	4.47321e-37	-0.651231	1.73975e-33	-0.666914	1.36351e-35	-0.656648	3.36771e-34	0.584056	0	-0.189992	0.00169921	-0.128231	0.0360045	-0.176699	0.0035983	-0.343468	3.01247e-09	-0.0360349	0.558704	0.0481401	0.434445	-0.059235	0.335889	0.013821	0.822632
1BF2	A	-0.566267	3.0482e-58	-0.543528	6.42804e-53	-0.56306	1.82e-57	-0.5463	1.51649e-53	0.47155	0	-0.158962	3.12027e-05	-0.0601934	0.118823	-0.150431	8.29596e-05	-0.313921	1.21107e-17	-0.00581618	0.880419	0.00120874	0.975059	-0.0203699	0.598209	0.0157427	0.683834
1BG0	A	-0.716157	2.20658e-52	-0.685534	1.93097e-46	-0.708816	6.89463e-51	-0.687572	8.18701e-47	0.652495	0	-0.211269	0.000105046	-0.104084	0.0603931	-0.208278	0.000132796	-0.302629	1.21466e-08	-0.0413464	0.457742	0.0192844	0.72926	-0.0570427	0.305239	0.06673	0.2301
1BH2	A	-0.612974	3.8943e-32	-0.540496	5.27539e-24	-0.621751	2.87604e-33	-0.530405	5.05969e-23	0.557048	0	-0.303183	4.64097e-08	0.048937	0.400052	-0.326332	3.03774e-09	-0.264609	2.44338e-06	0.0912043	0.115709	-0.115028	0.0467149	0.109927	0.05749	0.067699	0.24384
1BOL	A	-0.60207	2.60843e-21	-0.489553	1.42946e-13	-0.59553	8.93949e-21	-0.488284	1.68676e-13	0.544937	0	-0.379403	7.26683e-09	-0.0891103	0.206921	-0.377395	8.98114e-09	-0.25617	0.000185144	0.145329	0.0382545	0.0104063	0.883284	0.135501	0.0536969	0.00955659	0.892755
1BP2	A	-0.738609	4.47996e-21	-0.664676	5.50872e-16	-0.728306	2.8837e-20	-0.657075	1.52613e-15	0.682936	0	-0.322172	0.000316282	-0.127876	0.172407	-0.33743	0.000148531	-0.282403	0.00183644	-0.00681834	0.942474	0.0351913	0.709401	-0.00794661	0.932976	0.0246938	0.793773
1BQC	A	-0.710841	1.07198e-42	-0.665344	9.28734e-36	-0.71052	1.21269e-42	-0.662873	2.04121e-35	0.624198	0	-0.250599	2.42294e-05	-0.0490099	0.423543	-0.257278	1.41035e-05	-0.340207	3.6225e-09	-0.0137067	0.823092	-0.0441178	0.471376	-0.0172642	0.77824	-0.00829815	0.89234
1BS4	A	-0.594396	1.82051e-16	-0.530516	7.53359e-13	-0.596152	1.41024e-16	-0.52701	1.13272e-12	0.585775	6.66134e-16	-0.270432	0.000470253	-0.0194728	0.808408	-0.277158	0.000329057	-0.165702	0.0364481	0.0356924	0.656573	-0.0496926	0.535631	0.0353451	0.659707	0.131466	0.0987244
1BS9	A	-0.586648	7.65798e-18	-0.530751	2.52803e-14	-0.579234	2.45402e-17	-0.531015	2.44126e-14	0.59824	0	-0.251235	0.000595504	-0.0930015	0.216589	-0.249369	0.000658123	-0.114208	0.128314	0.025675	0.734037	0.00232251	0.97549	-0.00250201	0.973596	0.163641	0.0282104
1BT1	A	-0.64484	3.48302e-38	-0.595158	2.22302e-31	-0.652168	2.68734e-39	-0.583581	5.85578e-30	0.599708	0	-0.248956	6.01636e-06	0.0256016	0.652054	-0.276286	4.15887e-07	-0.244379	9.11011e-06	0.0193185	0.733705	-0.100797	0.0744554	0.0328825	0.562408	0.0595959	0.293184
1BU7	A	-0.449855	8.21381e-23	-0.401408	4.44706e-18	-0.438407	1.26731e-21	-0.41308	3.77292e-19	0.471528	0	-0.214406	5.73408e-06	-0.143878	0.00266142	-0.180659	0.000147296	-0.111703	0.0201923	0.0687666	0.154341	0.102625	0.0330148	0.0300561	0.534363	0.180129	0.000154277
1BVV	A	-0.56759	7.46499e-15	-0.484024	1.17152e-10	-0.567243	7.81576e-15	-0.469796	4.7439e-10	0.548905	8.21565e-14	-0.306084	6.25873e-05	-0.0547769	0.494612	-0.329228	1.4193e-05	-0.161591	0.041492	0.0762104	0.341311	-0.0510535	0.524489	0.0833131	0.297941	0.0724558	0.36576
1BVZ	A	-0.563999	1.13528e-46	-0.520607	7.69622e-39	-0.585451	5.44886e-51	-0.49439	1.25038e-34	0.505156	0	-0.222488	1.23443e-07	0.151189	0.000393687	-0.297565	5.09567e-13	-0.266285	1.53522e-10	0.0493765	0.251956	-0.217982	2.26907e-07	0.121948	0.00441077	0.0894149	0.0374919
1BWL	A	-0.665752	7.81992e-48	-0.599431	8.75274e-37	-0.660195	8.4615e-47	-0.593213	7.05727e-36	0.653274	0	-0.300808	2.16906e-09	-0.0860623	0.101214	-0.314341	3.3282e-10	-0.201849	9.21785e-05	0.0810985	0.122632	0.00617123	0.906786	0.0865255	0.0993762	0.155833	0.00275986
1BWZ	A	-0.688446	9.39321e-36	-0.601321	1.76362e-25	-0.678504	2.11352e-34	-0.605785	6.25124e-26	0.626834	0	-0.346063	9.57894e-09	-0.129671	0.0419123	-0.334125	3.49368e-08	-0.292506	1.95098e-06	0.0859516	0.179577	0.0567778	0.376328	0.0682391	0.287315	0.0672416	0.294451
1BYA	A	-0.607051	7.45675e-47	-0.529608	4.81672e-34	-0.609874	2.17527e-47	-0.528222	7.63469e-34	0.619734	0	-0.326192	2.63571e-13	-0.00291964	0.950669	-0.326487	2.49428e-13	-0.164788	0.00039984	0.135553	0.00374273	-0.058685	0.212889	0.130771	0.0051902	0.206676	7.60474e-06
1BZC	A	-0.684059	4.1094e-40	-0.645793	1.4868e-34	-0.687823	1.04851e-40	-0.63129	1.19378e-32	0.603585	0	-0.226348	0.000106831	0.00374095	0.950265	-0.26388	5.08052e-06	-0.323434	1.20478e-08	-0.0185713	0.75679	-0.0719571	0.229021	0.0149063	0.803697	0.0314318	0.600047
1C82	A	-0.662501	1.23017e-86	-0.623296	5.10468e-74	-0.661125	3.67525e-86	-0.623431	4.65008e-74	0.603573	0	-0.22585	1.8049e-09	-0.0462055	0.230156	-0.224824	2.15476e-09	-0.300309	3.14327e-16	0.0244503	0.525763	-0.0176971	0.646108	0.0174488	0.650743	0.124812	0.00110077
1CA2	A	-0.751407	2.0604e-43	-0.639713	4.21556e-28	-0.742173	7.52965e-42	-0.629023	5.82984e-27	0.671135	0	-0.424909	1.21929e-12	-0.118445	0.0710594	-0.441414	9.74555e-14	-0.337922	5.53213e-08	0.158642	0.0150373	0.0154057	0.815639	0.160944	0.0135988	0.00019621	0.997631
1CB8	A	-0.669282	1.1179e-82	-0.631163	5.54366e-71	-0.671302	2.39758e-83	-0.624987	3.06944e-69	0.580111	0	-0.223633	9.95476e-09	-0.0160196	0.688995	-0.241824	4.79926e-10	-0.34409	5.46764e-20	0.0209708	0.600303	-0.0544471	0.173164	0.0338874	0.396999	0.0835986	0.0361152
1CBX	A	-0.640472	5.85507e-34	-0.598781	7.97815e-29	-0.633985	4.15208e-33	-0.599076	7.38159e-29	0.692199	0	-0.227328	9.65071e-05	-0.0910818	0.126583	-0.226582	0.000102029	-0.0656813	0.271564	0.00346907	0.953792	0.00530904	0.929336	-0.00520448	0.930725	0.270646	2.65384e-06
1CDG	A	-0.521623	1.73073e-44	-0.479197	7.42413e-37	-0.535771	2.78299e-47	-0.461448	5.74642e-34	0.551337	0	-0.219413	2.38159e-08	0.117058	0.00343989	-0.272856	1.93344e-12	-0.136059	0.00065297	0.0753715	0.0606541	-0.1693	2.01282e-05	0.123666	0.00198105	0.224487	1.08078e-08
1CEL	A	-0.708598	2.32987e-59	-0.62325	2.21833e-42	-0.706402	7.59964e-59	-0.620563	6.25878e-42	0.682618	0	-0.362708	3.815e-14	-0.0625282	0.223197	-0.36687	1.75508e-14	-0.236846	2.14058e-06	0.133739	0.00869679	-0.0283173	0.581789	0.13259	0.00930048	0.14125	0.00553686
1CHD	A	-0.460941	1.21367e-10	-0.393962	6.31525e-08	-0.439445	1.04987e-09	-0.39998	3.80091e-08	0.425404	3.97043e-09	-0.247324	0.000786941	-0.183294	0.0141903	-0.232203	0.00168958	-0.177932	0.0173933	0.0625199	0.409978	0.119341	0.113881	0.0379007	0.617875	0.0127526	0.866782
1CHK	B	-0.602339	3.19108e-22	-0.492175	2.84625e-14	-0.589926	3.58737e-21	-0.493448	2.38787e-14	0.603586	0	-0.369689	9.56548e-09	-0.123933	0.07166	-0.3639	1.75502e-08	-0.159684	0.0196518	0.126866	0.0650974	0.0236653	0.732801	0.114466	0.0965577	0.164327	0.0162784
1CM0	A	-0.568366	5.96615e-14	-0.502779	8.62058e-11	-0.572012	3.79383e-14	-0.488747	3.37337e-10	0.508585	4.81228e-11	-0.272848	0.000665756	-0.0133372	0.872833	-0.306241	0.000113216	-0.253739	0.00164451	0.0647466	0.436219	-0.0658406	0.428474	0.0980681	0.237001	0.00154937	0.985166
1CNS	A	-0.675769	1.23117e-29	-0.585618	6.55856e-21	-0.663661	2.74912e-28	-0.585479	6.73247e-21	0.692232	0	-0.354148	4.38313e-08	-0.133809	0.0509375	-0.350104	6.54033e-08	-0.149223	0.0291302	0.108191	0.115641	0.0410757	0.552294	0.0932452	0.175759	0.211635	0.00174522
1COY	A	-0.626764	1.6522e-49	-0.569727	2.58847e-39	-0.618546	6.56302e-48	-0.569806	2.51346e-39	0.524062	0	-0.269008	5.05345e-09	-0.103715	0.0290821	-0.265857	7.84855e-09	-0.344423	1.61551e-14	0.0641988	0.178187	0.0228682	0.632137	0.0502581	0.29227	0.0208686	0.662225
1CQQ	A	-0.469288	4.38517e-10	-0.399434	1.83129e-07	-0.455777	1.57077e-09	-0.407065	1.0105e-07	0.384201	5.74479e-07	-0.256544	0.000915818	-0.138097	0.0815924	-0.237917	0.00221754	-0.274785	0.000357707	0.0716342	0.369711	0.0810701	0.309673	0.0455561	0.568958	-0.0537208	0.50162
1CVR	A	-0.447642	7.33758e-21	-0.421027	2.10813e-18	-0.448602	5.92555e-21	-0.415074	6.99226e-18	0.353531	4.51639e-13	-0.152214	0.0022944	-0.0141882	0.778756	-0.168939	0.000689804	-0.280219	7.48726e-09	0.00705934	0.888841	-0.0325897	0.518548	0.0210694	0.676499	-0.0558918	0.267717
1CWY	A	-0.711062	5.42872e-71	-0.642692	3.8394e-54	-0.707496	5.41762e-70	-0.639916	1.50784e-53	0.626109	0	-0.313728	2.39954e-12	-0.0715263	0.12821	-0.318599	1.00336e-12	-0.344243	7.37589e-15	0.0766134	0.1031	-0.00758184	0.87222	0.073411	0.118407	0.0700423	0.136361
1CZ1	A	-0.757466	1.02501e-67	-0.706061	3.726e-55	-0.764056	1.48586e-69	-0.68894	1.4737e-51	0.705593	0	-0.274638	7.70409e-08	0.0142246	0.788961	-0.31879	2.48098e-10	-0.292674	8.47173e-09	0.0138685	0.794124	-0.101139	0.0557833	0.0500965	0.3453	0.0988151	0.061715
1CZF	A	-0.56152	1.16139e-25	-0.422167	4.75796e-14	-0.544556	6.03212e-24	-0.420822	5.8291e-14	0.501626	0	-0.426755	1.04045e-15	-0.152674	0.00863314	-0.424517	1.57848e-15	-0.253594	8.31995e-06	0.212227	0.000222525	0.0674262	0.250613	0.204942	0.000371456	0.0251828	0.668474
1D1Q	A	-0.66765	2.57447e-20	-0.659554	1.04801e-19	-0.675198	6.67974e-21	-0.650432	4.84423e-19	0.602045	8.88178e-16	-0.152935	0.0633009	0.0266821	0.748742	-0.176235	0.0316779	-0.288965	0.000292227	-0.11245	0.17446	-0.104156	0.208858	-0.0914607	0.270397	0.0142506	0.864205
1D4C	A	-0.668205	4.31551e-66	-0.643254	7.49981e-60	-0.663908	5.65701e-65	-0.64089	2.73042e-59	0.588812	0	-0.182586	3.40946e-05	-0.0758478	0.0896018	-0.190435	1.49827e-05	-0.33556	1.8766e-15	-0.0248098	0.5797	0.00538737	0.904304	-0.0225367	0.614926	0.113152	0.0110408
1D6O	A	-0.570205	2.42878e-09	-0.448538	6.51294e-06	-0.57073	2.33057e-09	-0.443062	8.69037e-06	0.529279	4.91088e-08	-0.361298	0.000237035	-0.0452756	0.667222	-0.366722	0.000184344	-0.212615	0.0389946	0.0811713	0.439755	-0.0514682	0.6249	0.0751996	0.474342	0.014404	0.891297
1DDJ	A	-0.678555	4.90905e-31	-0.617836	1.504e-24	-0.657943	1.15157e-28	-0.632103	6.05586e-26	0.5879	0	-0.285212	1.16787e-05	-0.195265	0.00335829	-0.246763	0.000176104	-0.339942	1.0108e-07	0.051295	0.449279	0.102864	0.127668	-0.00306149	0.964029	-0.0274023	0.68635
1DGK	N	-0.514137	1.86816e-56	-0.442568	1.33101e-40	-0.510936	1.15781e-55	-0.443267	9.70023e-41	0.536646	0	-0.295002	1.15047e-18	-0.0579095	0.0975181	-0.289688	5.33932e-18	-0.143638	3.38142e-05	0.136216	8.57527e-05	0.00849967	0.808154	0.126758	0.000261848	0.210436	7.80065e-10
1DGS	A	-0.533397	1.36082e-40	-0.431207	1.36544e-25	-0.527489	1.40038e-39	-0.428285	3.11919e-25	0.476579	0	-0.352237	4.22462e-18	-0.0824289	0.0566591	-0.354922	2.16827e-18	-0.260794	4.81495e-10	0.15968	0.00019346	0.0229396	0.596982	0.15775	0.000232145	0.103096	0.0169211
1DNP	A	-0.677747	1.81529e-60	-0.620427	3.64087e-48	-0.677912	1.6573e-60	-0.615848	2.72717e-47	0.63655	0	-0.276471	1.81099e-09	-0.0367319	0.44226	-0.286715	3.94202e-10	-0.272818	3.06631e-09	0.0449999	0.346368	-0.039666	0.406622	0.0461886	0.333752	0.142423	0.00263011
1DVE	A	-0.687491	1.32321e-29	-0.601011	3.19033e-21	-0.688319	1.06455e-29	-0.598989	4.67569e-21	0.666356	0	-0.336938	4.45805e-07	-0.0352876	0.618412	-0.341122	3.06888e-07	-0.201971	0.00362471	0.0457891	0.517882	-0.0488343	0.490373	0.0500826	0.479324	0.110354	0.117278
1E0C	A	-0.590987	6.72273e-24	-0.563269	2.07952e-21	-0.595896	2.29706e-24	-0.557534	6.37561e-21	0.603682	0	-0.180003	0.00493611	-0.0113845	0.861156	-0.196416	0.00208851	-0.137153	0.0334124	-0.0201682	0.756642	-0.0771753	0.234386	-0.0125574	0.847017	0.184329	0.00396314
1E1A	A	-0.598701	1.99329e-28	-0.569184	2.86992e-25	-0.595764	4.25169e-28	-0.569592	2.60852e-25	0.531059	0	-0.186187	0.00167505	-0.0595402	0.322606	-0.185418	0.00175364	-0.276599	1.8141e-06	-0.013899	0.817695	-0.00601383	0.920559	-0.0192754	0.749191	0.00933582	0.87696
1E6E	A	-0.711009	7.70611e-65	-0.70799	4.55608e-64	-0.718911	6.59355e-67	-0.697482	1.85986e-61	0.591313	0	-0.134065	0.00615638	0.0271121	0.582881	-0.165682	0.000669374	-0.395084	3.08455e-18	-0.117001	0.0170572	-0.109698	0.0254374	-0.0916367	0.0624141	0.0144389	0.769984
1EB6	A	-0.622205	4.64718e-19	-0.509902	2.64765e-12	-0.623211	3.927e-19	-0.501119	7.11718e-12	0.598991	0	-0.400169	2.73342e-08	-0.0323907	0.679986	-0.416887	5.29672e-09	-0.196692	0.010669	0.181649	0.0187163	-0.0479822	0.540923	0.194361	0.0116721	0.101681	0.193281
1EH5	A	-0.745633	1.11379e-46	-0.649276	4.91143e-32	-0.732579	2.51538e-44	-0.653789	1.3325e-32	0.709282	0	-0.390862	1.43476e-11	-0.153322	0.0135903	-0.373896	1.43386e-10	-0.252084	3.42123e-05	0.135515	0.0295875	0.0648967	0.300937	0.10616	0.0894756	0.103242	0.0987405
1EUG	A	-0.751381	1.66004e-38	-0.683022	1.63457e-29	-0.750849	2.00064e-38	-0.670521	3.95969e-28	0.695341	0	-0.316419	2.12944e-06	-0.0540089	0.442052	-0.346646	1.50094e-07	-0.292848	1.34292e-05	0.0454655	0.517726	-0.0460282	0.512546	0.0720391	0.304639	0.0684601	0.329417
1EUU	A	-0.474229	2.08343e-31	-0.472383	3.8157e-31	-0.465852	3.15137e-30	-0.471628	4.88243e-31	0.342857	4.44089e-16	-0.0833726	0.0534175	-0.103531	0.016256	-0.0884998	0.0402449	-0.328914	8.91342e-16	-0.0721355	0.0949734	0.0533299	0.217587	-0.0732922	0.0897639	-0.029016	0.502751
1EX1	A	-0.634292	8.67412e-62	-0.576512	6.90554e-49	-0.636714	2.1709e-62	-0.572257	4.89652e-48	0.653321	0	-0.279274	1.80478e-11	-0.0152362	0.724744	-0.288696	3.21493e-12	-0.162669	0.000139098	0.0896294	0.0375655	-0.0575387	0.182914	0.0921754	0.0324246	0.225751	8.55567e-08
1EXN	A	-0.340933	3.63354e-08	-0.311837	5.40003e-07	-0.339225	4.29115e-08	-0.320785	2.42622e-07	0.264466	2.45237e-05	-0.139583	0.0273545	-0.0343659	0.590419	-0.115719	0.0682217	-0.218827	0.000447676	0.0221399	0.728869	-0.00435036	0.94571	-0.00765616	0.904609	-0.0398995	0.531955
1EXP	A	-0.682209	1.65312e-40	-0.591273	2.35318e-28	-0.693085	2.89325e-42	-0.573516	2.06622e-26	0.659437	0	-0.358665	1.02144e-10	0.0334853	0.573008	-0.402412	1.41641e-13	-0.217143	0.000182412	0.113291	0.0550849	-0.126804	0.0315126	0.159521	0.00656033	0.128839	0.0288426
1EYP	A	-0.454044	3.31293e-11	-0.397689	1.02243e-08	-0.444049	9.90236e-11	-0.411447	2.77714e-09	0.469058	5.973e-12	-0.222541	0.00165288	-0.110697	0.124715	-0.192084	0.00697717	-0.087463	0.22619	0.0390583	0.59003	0.0572539	0.429244	-0.00542628	0.940376	0.146662	0.0409838
1FF3	A	-0.556082	9.84421e-17	-0.486824	1.22215e-12	-0.535655	1.99104e-15	-0.502048	1.84115e-13	0.59551	0	-0.276971	8.45293e-05	-0.175104	0.015284	-0.239191	0.000780404	-0.0532067	0.467427	0.0669639	0.360023	0.0914396	0.210455	0.00614791	0.933177	0.219627	0.00213863
1FGH	A	-0.744048	1.10491e-120	-0.686998	5.8853e-96	-0.743935	1.25579e-120	-0.684729	4.31588e-95	0.710581	0	-0.304176	1.02398e-16	-0.0352651	0.3589	-0.308504	3.38651e-17	-0.294202	1.20986e-15	0.104315	0.00639019	-0.0327871	0.393702	0.102082	0.00762913	0.194607	2.49057e-07
1FHL	A	-0.700542	9.3579e-47	-0.624872	9.23645e-35	-0.702993	3.30472e-47	-0.608456	1.40649e-32	0.62669	0	-0.322976	2.52325e-09	-0.0299539	0.600726	-0.357494	2.30673e-11	-0.315151	6.65518e-09	0.0634068	0.267178	-0.0658672	0.248983	0.0852217	0.135236	0.0360767	0.528392
1FOA	A	-0.706981	9.13041e-50	-0.651924	4.17768e-40	-0.709259	3.2521e-50	-0.644069	6.88655e-39	0.59067	0	-0.276935	2.87624e-07	-0.0183104	0.744378	-0.297264	2.9697e-08	-0.388874	5.68184e-14	0.0433186	0.44012	-0.0596844	0.28708	0.0580447	0.300574	-0.0171023	0.760714
1G24	A	-0.614281	2.08824e-21	-0.613751	2.30916e-21	-0.619587	7.5456e-22	-0.615141	1.77276e-21	0.550049	0	-0.130508	0.0696084	0.00985269	0.891966	-0.131823	0.0667943	-0.274282	8.44225e-05	-0.127992	0.0752603	-0.0815155	0.259588	-0.135777	0.0588843	0.0210761	0.771374
1G6T	A	-0.793421	3.02344e-85	-0.702088	6.90678e-59	-0.792038	9.46178e-85	-0.692093	1.31145e-56	0.714733	0	-0.376698	1.47384e-15	-0.061019	0.230328	-0.398725	1.45075e-17	-0.351212	1.83719e-13	0.0728854	0.151593	-0.0391173	0.442413	0.0919652	0.0699604	0.0683775	0.178686
1G8O	A	-0.621872	2.13831e-30	-0.543406	3.20007e-22	-0.615743	1.12818e-29	-0.539279	7.54428e-22	0.646402	0	-0.325606	1.72417e-08	-0.089445	0.141516	-0.331433	8.87998e-09	-0.112949	0.0627497	0.120767	0.0464139	0.0203634	0.738808	0.118088	0.0515586	0.209447	0.000453923
1GA8	A	-0.666616	2.28803e-33	-0.623351	3.32573e-28	-0.677304	8.86974e-35	-0.604246	3.58088e-26	0.533198	0	-0.236247	0.000137109	0.0600058	0.345756	-0.285092	3.08471e-06	-0.417167	6.04892e-13	-0.00113292	0.985823	-0.13403	0.0338948	0.0448676	0.481165	-0.118114	0.0620959
1GAL	A	-0.605107	1.50231e-53	-0.577164	8.81284e-48	-0.596675	9.48717e-52	-0.57691	9.88558e-48	0.529538	0	-0.181905	2.45976e-05	-0.11044	0.0112795	-0.183015	2.18514e-05	-0.297326	1.23651e-12	-0.00729951	0.867796	0.0454289	0.299731	-0.0128524	0.769443	0.0515666	0.239009
1GCU	A	-0.580662	7.91438e-26	-0.556956	1.7603e-23	-0.577112	1.82832e-25	-0.560482	8.09646e-24	0.529853	0	-0.167526	0.00540527	-0.0641188	0.292876	-0.159136	0.00832023	-0.241743	4.53347e-05	-0.0331271	0.587397	-0.00133417	0.982575	-0.0479247	0.432182	0.0448949	0.461911
1GOG	A	-0.658357	7.51274e-72	-0.598285	1.94957e-56	-0.651153	8.13201e-70	-0.602921	1.64432e-57	0.646396	0	-0.293166	3.12907e-13	-0.103077	0.0137694	-0.274722	1.11072e-11	-0.236639	7.06882e-09	0.102262	0.0145432	0.0345085	0.411791	0.0745137	0.0757153	0.200978	1.07881e-06
1GP5	A	-0.627182	7.95097e-37	-0.540745	5.33121e-26	-0.617575	1.87031e-35	-0.540063	6.31225e-26	0.545961	0	-0.34906	2.4943e-11	-0.127074	0.0217141	-0.343562	5.58732e-11	-0.310875	4.62425e-09	0.144536	0.00886914	0.0647275	0.245185	0.127848	0.020914	0.0368777	0.508505
1GQ8	A	-0.645352	5.76398e-35	-0.554927	2.03279e-24	-0.641972	1.65765e-34	-0.555991	1.59298e-24	0.662907	0	-0.343083	8.58959e-10	-0.0672629	0.257592	-0.340336	1.2166e-09	-0.135341	0.0217985	0.0957627	0.106191	-0.0131612	0.825067	0.0920588	0.120537	0.203185	0.00049261
1H19	A	-0.772711	8.61574e-116	-0.716246	4.69813e-92	-0.768214	1.1773e-113	-0.714208	2.62777e-91	0.648966	0	-0.300018	4.64253e-14	-0.0846242	0.0416979	-0.301967	3.06626e-14	-0.423856	3.19559e-29	0.0770517	0.0638619	0.0151962	0.715535	0.0647718	0.119603	0.0610602	0.1424
1H3I	A	-0.291365	1.75662e-06	-0.197345	0.00138254	-0.279358	4.78044e-06	-0.202427	0.00102942	0.320585	1.2604e-07	-0.309977	1.7251e-07	-0.105094	0.0902334	-0.271829	5.94736e-06	-0.0277061	0.656801	0.223914	0.000230386	0.0647478	0.298262	0.173131	0.00483159	0.136563	0.0271072
1HKA	A	-0.522358	9.81206e-12	-0.43951	2.28913e-08	-0.510935	3.24651e-11	-0.44464	1.50047e-08	0.487788	3.21501e-10	-0.301352	0.000141419	-0.127378	0.122	-0.284921	0.00034457	-0.193774	0.0173869	0.105472	0.201542	0.0664957	0.422269	0.0776305	0.348437	0.0512569	0.536557
1HPM	A	-0.446683	1.61219e-18	-0.439163	6.90221e-18	-0.448107	1.21907e-18	-0.439403	6.59381e-18	0.317498	1.29692e-09	-0.0980744	0.0667839	-0.010261	0.848623	-0.0984272	0.0657998	-0.321195	2.81095e-10	-0.0543852	0.311002	-0.0371421	0.489339	-0.0568968	0.289118	-0.0666773	0.213855
1HQC	A	-0.3441	2.58226e-09	-0.202734	0.00058769	-0.341861	3.32073e-09	-0.195433	0.000929769	0.278337	1.89398e-06	-0.382231	4.09488e-12	-0.0395775	0.506716	-0.401242	2.08743e-13	-0.206533	0.000402547	0.262292	5.20524e-06	-0.00557355	0.925561	0.284227	6.71346e-07	-0.0415088	0.486169
1I1E	A	-0.392301	2.0328e-46	-0.351858	4.49036e-37	-0.387546	2.99525e-45	-0.357069	3.32681e-38	0.432698	0	-0.202048	5.28946e-13	-0.0755478	0.00803324	-0.179718	1.64116e-10	-0.115102	5.03813e-05	0.103573	0.000269304	0.0447195	0.117323	0.0767923	0.00704756	0.215816	1.05296e-14
1I1I	P	-0.599215	1.81423e-62	-0.542348	2.60763e-49	-0.601342	5.18429e-63	-0.537957	2.1386e-48	0.524951	0	-0.265648	5.63017e-12	-0.0134492	0.736675	-0.274807	8.98122e-13	-0.304154	1.43952e-15	0.075172	0.0594796	-0.052284	0.190572	0.0765368	0.0549782	0.0949977	0.0170451
1I9A	A	-0.640531	2.5619e-20	-0.583638	2.36941e-16	-0.639617	3.01238e-20	-0.582876	2.64615e-16	0.592053	0	-0.263964	0.000515658	-0.0482817	0.53965	-0.266387	0.000453564	-0.248104	0.00115531	-0.00555832	0.943773	-0.0340698	0.665343	-0.0206448	0.793315	0.0424483	0.589822
1IDJ	A	-0.597003	1.30403e-31	-0.56669	5.50887e-28	-0.581247	1.11441e-29	-0.573576	8.91773e-29	0.607876	0	-0.192056	0.000569712	-0.154217	0.00599338	-0.179574	0.00130914	-0.137203	0.014737	-0.0401347	0.479433	0.0722438	0.202198	-0.0694554	0.220255	0.178678	0.00138674
1IG8	A	-0.715745	2.03947e-68	-0.657287	2.75325e-54	-0.721924	4.03061e-70	-0.650361	8.08783e-53	0.608987	0	-0.289162	4.74663e-10	0.0206349	0.67048	-0.306446	3.20438e-11	-0.380426	2.24587e-17	0.0578788	0.232006	-0.0964837	0.0456749	0.0677308	0.161657	0.0574266	0.235687
1IM5	A	-0.690736	2.68769e-24	-0.57957	6.4503e-16	-0.693465	1.49908e-24	-0.566358	4.00321e-15	0.654145	0	-0.386214	1.2945e-07	-0.0276935	0.726838	-0.412736	1.10489e-08	-0.238587	0.00194877	0.0891369	0.259123	-0.0674094	0.394248	0.118303	0.133021	0.0878185	0.266291
1INP	A	-0.603129	1.5701e-37	-0.609902	1.46751e-38	-0.600583	3.77095e-37	-0.610107	1.36444e-38	0.477737	0	-0.0674092	0.198628	-0.0560492	0.285481	-0.074533	0.155014	-0.375111	1.36964e-14	-0.112962	0.0305346	-0.00879426	0.867111	-0.118416	0.0232698	-0.0719507	0.169904
1IU4	A	-0.270983	1.69005e-06	-0.213253	0.000184144	-0.27998	7.31346e-07	-0.204084	0.000349579	0.32422	7.59843e-09	-0.203287	0.000322987	0.0582238	0.312409	-0.21909	0.000100558	0.00418922	0.942156	0.115632	0.0437654	-0.0913636	0.112036	0.127354	0.0261523	0.178057	0.00172368
1J00	A	-0.576305	6.77423e-16	-0.441957	3.13359e-09	-0.568504	2.01307e-15	-0.443359	2.75701e-09	0.556728	9.76996e-15	-0.426215	2.25539e-09	-0.0995961	0.204068	-0.419794	4.39106e-09	-0.172469	0.0263054	0.211796	0.00596362	0.0314396	0.689804	0.20166	0.0089897	0.0869717	0.267972
1J09	A	-0.636809	1.65235e-50	-0.574103	3.06595e-39	-0.635541	2.96532e-50	-0.572383	5.78306e-39	0.498149	0	-0.281938	1.1541e-09	-0.0491618	0.307972	-0.285448	6.87426e-10	-0.397077	3.21398e-19	0.0596435	0.21588	-0.0283412	0.557037	0.059806	0.214627	-0.0172248	0.721228
1JH6	A	-0.65616	8.5652e-23	-0.593278	6.34549e-18	-0.656492	8.01502e-23	-0.578088	6.6845e-17	0.544088	8.43769e-15	-0.280593	0.000131942	-0.0331667	0.664325	-0.310588	1.93059e-05	-0.377067	1.01642e-07	-0.0128659	0.86638	-0.0391945	0.608002	0.010224	0.893637	-0.0875515	0.250433
1JMS	A	-0.64491	3.94297e-41	-0.614434	1.81899e-36	-0.64428	4.98619e-41	-0.617871	5.74478e-37	0.585398	0	-0.200817	0.000175435	-0.0409916	0.452712	-0.193175	0.000313881	-0.284014	5.90752e-08	-0.0441315	0.418788	-0.0294445	0.589779	-0.056324	0.301821	0.0862885	0.112909
1JOA	A	-0.527131	6.54681e-31	-0.455205	1.61971e-22	-0.533148	1.04513e-31	-0.439767	5.83587e-21	0.473747	0	-0.283325	2.20403e-09	0.0173673	0.725053	-0.319205	9.09062e-12	-0.251518	1.42495e-07	0.0980712	0.0459983	-0.0817418	0.0967733	0.131985	0.00701591	0.0991511	0.0436331
1JS4	A	-0.677821	5.84879e-75	-0.623857	1.93985e-60	-0.671058	5.69682e-73	-0.62917	9.65453e-62	0.633729	0	-0.278348	1.3287e-11	-0.103712	0.0149206	-0.259663	3.44725e-10	-0.291443	1.1389e-12	0.0850486	0.0462944	0.0404137	0.345048	0.0619496	0.147334	0.16465	9.74006e-05
1K30	A	-0.550679	1.97036e-28	-0.49595	1.42868e-22	-0.541195	2.44346e-27	-0.499141	6.94333e-23	0.455625	0	-0.253251	1.48779e-06	-0.118012	0.0288972	-0.241732	4.64934e-06	-0.309282	2.24168e-09	0.0827987	0.126642	0.0597573	0.271074	0.0657952	0.225414	-0.00146671	0.978488
1KL7	A	-0.744706	9.46156e-85	-0.690419	3.12769e-68	-0.736275	6.43668e-82	-0.690397	3.16924e-68	0.616698	0	-0.284807	1.18506e-10	-0.123792	0.00683967	-0.283029	1.57928e-10	-0.420318	9.91867e-24	0.0566133	0.218952	0.0532696	0.247477	0.0465434	0.312433	0.0489474	0.288041
1KNP	A	-0.596195	3.36326e-48	-0.557693	3.76182e-41	-0.60264	1.78709e-49	-0.55315	2.22615e-40	0.621257	0	-0.212882	1.64083e-06	0.0451359	0.320221	-0.226354	3.17946e-07	-0.149207	0.000901112	0.0298512	0.511169	-0.0988086	0.0289271	0.041973	0.355372	0.229727	2.07072e-07
1L1D	A	-0.682622	7.06959e-19	-0.602235	5.49023e-14	-0.673777	2.90227e-18	-0.613412	1.3877e-14	0.686189	0	-0.333066	7.83866e-05	-0.112871	0.204065	-0.302325	0.000391072	-0.145948	0.0990637	0.0874456	0.32638	0.0272537	0.760504	0.0412515	0.644369	0.161813	0.0667607
1L1L	A	-0.622118	7.44283e-72	-0.591326	2.16344e-63	-0.620076	2.89816e-71	-0.588818	9.65944e-63	0.462343	0	-0.193796	4.20304e-07	-0.0509176	0.191613	-0.201625	1.34644e-07	-0.417989	4.68672e-32	0.0138929	0.721941	-0.00753942	0.846874	0.0181206	0.642511	-0.0380219	0.329789
1L6P	A	-0.476599	1.08419e-07	-0.288257	0.00205542	-0.471978	1.49331e-07	-0.31027	0.000870615	0.460382	3.26695e-07	-0.457914	7.5441e-08	-0.0662618	0.488111	-0.405432	3.64816e-06	-0.159782	0.0910511	0.256185	0.00565767	-0.0026131	0.978235	0.183019	0.0519437	0.101662	0.286013
1L7N	A	-0.697141	5.60654e-29	-0.588279	4.46966e-19	-0.685606	1.00773e-27	-0.590639	2.98244e-19	0.685948	0	-0.389213	7.55897e-09	-0.135538	0.0613844	-0.384773	1.19409e-08	-0.199651	0.00533163	0.107487	0.139292	0.0491993	0.500562	0.104397	0.151159	0.156141	0.030641
1L7Q	A	-0.520078	2.63982e-37	-0.453218	1.18312e-27	-0.526378	2.49645e-38	-0.447017	7.32487e-27	0.546111	0	-0.28656	1.08815e-11	0.0249221	0.571191	-0.298947	1.10944e-12	-0.12078	0.00571279	0.130543	0.0027811	-0.0849317	0.0528342	0.136792	0.00170798	0.205776	1.78326e-06
1L8T	A	-0.684017	2.02383e-35	-0.647234	1.03066e-30	-0.688879	4.28065e-36	-0.637342	1.48068e-29	0.584413	0	-0.223581	0.000339463	0.00594026	0.926069	-0.248821	5.99714e-05	-0.355798	2.73285e-09	-0.0319619	0.617416	-0.0819198	0.199162	-0.0154476	0.809301	-0.0158873	0.80398
1L9X	A	-0.62034	5.30622e-30	-0.59612	2.84421e-27	-0.625453	1.3114e-30	-0.584975	4.30488e-26	0.584068	0	-0.18096	0.00269173	0.0158527	0.795958	-0.209271	0.000482304	-0.219746	0.00023902	-0.057313	0.349126	-0.0813762	0.182985	-0.0341965	0.576808	0.0678437	0.267408
1LBA	A	-0.668034	2.13681e-18	-0.574219	6.09435e-13	-0.654359	1.7603e-17	-0.589204	1.07213e-13	0.574876	5.6577e-13	-0.352779	1.85129e-05	-0.139469	0.109666	-0.318428	0.000136052	-0.343162	3.33132e-05	0.0889491	0.310445	0.0369947	0.674144	0.0478421	0.586438	-0.044421	0.613542
1LDM	A	-0.632242	3.16571e-35	-0.592884	3.78422e-30	-0.626687	1.82544e-34	-0.600894	3.99358e-31	0.558972	0	-0.223806	6.9694e-05	-0.0925196	0.107531	-0.19718	0.000494632	-0.29652	7.54263e-08	0.043258	0.453284	0.0395741	0.492725	0.0149491	0.79567	0.0253772	0.660163
1LJL	A	-0.657403	4.63248e-16	-0.561013	3.22122e-11	-0.661043	2.80443e-16	-0.540721	2.18206e-10	0.59508	9.5457e-13	-0.357211	3.80446e-05	-0.0113789	0.902453	-0.400766	2.46172e-06	-0.279438	0.00172142	0.100785	0.275256	-0.0702068	0.448438	0.144269	0.116357	0.00520001	0.955337
1LVH	A	-0.706368	3.84635e-32	-0.637933	1.05317e-24	-0.704319	6.89658e-32	-0.626781	1.15065e-23	0.572571	0	-0.304436	5.86487e-06	-0.0598643	0.395188	-0.329967	7.20943e-07	-0.413697	1.17672e-10	0.0261453	0.710786	-0.0263235	0.708903	0.0526935	0.454401	-0.00516412	0.941635
1M53	A	-0.689634	1.79976e-75	-0.651504	7.36597e-65	-0.677991	4.63561e-72	-0.657383	2.1476e-66	0.640889	0	-0.22668	1.0233e-07	-0.144177	0.000862167	-0.208749	1.05297e-06	-0.281004	2.13977e-11	0.0157022	0.71949	0.0697422	0.109856	-0.011544	0.791765	0.118771	0.00622764
1MBB	A	-0.758914	2.50131e-59	-0.696653	2.44809e-46	-0.760755	9.00279e-60	-0.682382	8.07994e-44	0.643442	0	-0.303076	2.51249e-08	-0.0319677	0.575203	-0.337467	3.35569e-10	-0.403237	1.15585e-14	0.0350647	0.538713	-0.0618048	0.27793	0.0598229	0.293689	0.0258242	0.650817
1MJ9	A	-0.56239	5.3044e-23	-0.547803	1.10204e-21	-0.557239	1.57492e-22	-0.541367	4.0119e-21	0.442835	7.28306e-14	-0.144136	0.0197794	-0.0778645	0.211437	-0.162879	0.00825798	-0.350703	2.07514e-09	-0.0676805	0.277755	0.0172085	0.783026	-0.0576645	0.355398	-0.0530428	0.395391
1MLA	A	-0.697159	6.31111e-42	-0.635177	6.34313e-33	-0.683414	9.7599e-40	-0.64741	1.55219e-34	0.61832	0	-0.288222	5.71808e-07	-0.170814	0.00397537	-0.259091	8.33009e-06	-0.323275	1.38378e-08	0.0221374	0.712974	0.101	0.091689	-0.0153832	0.798263	0.0282074	0.63921
1MRQ	A	-0.612631	6.46936e-33	-0.544063	5.64654e-25	-0.606718	3.73773e-32	-0.54778	2.32965e-25	0.588046	0	-0.29087	1.21012e-07	-0.0873146	0.127084	-0.280039	3.81869e-07	-0.208704	0.000203451	0.0727534	0.204165	0.0203291	0.723384	0.0562782	0.326502	0.118483	0.0377976
1MUD	A	-0.602383	7.86634e-22	-0.539831	4.71304e-17	-0.607244	3.01737e-22	-0.527007	3.42584e-16	0.615913	0	-0.272237	5.3235e-05	-0.00132599	0.98489	-0.300663	6.71074e-06	-0.128705	0.0637839	0.0516336	0.460235	-0.0766937	0.271925	0.0725882	0.298568	0.181792	0.00827812
1MUG	A	-0.661609	5.50701e-20	-0.577977	1.45315e-14	-0.667261	2.04626e-20	-0.550192	4.37654e-13	0.552773	3.23297e-13	-0.322836	4.00149e-05	-0.0100692	0.903489	-0.373005	1.29224e-06	-0.371282	1.47203e-06	0.0235522	0.776652	-0.0872501	0.291584	0.0641637	0.438796	-0.0753742	0.362709
1NDH	A	-0.542914	1.44406e-20	-0.479204	9.29799e-16	-0.542557	1.54685e-20	-0.46047	1.59165e-14	0.474278	1.9984e-15	-0.262714	1.87572e-05	-0.0337222	0.595913	-0.302762	5.95726e-07	-0.265759	1.47405e-05	0.0624453	0.325448	-0.0273796	0.666857	0.0945611	0.135481	0.0284848	0.654257
1NDI	A	-0.731154	2.11316e-95	-0.663647	7.10464e-73	-0.728722	1.79361e-94	-0.661433	3.09937e-72	0.661507	0	-0.329892	1.26335e-16	-0.0600451	0.154225	-0.332034	7.59546e-17	-0.331014	9.68327e-17	0.121119	0.00385215	-0.00743372	0.860234	0.114689	0.00624743	0.11214	0.00751878
1NLU	A	-0.664185	7.96805e-42	-0.641068	3.34812e-38	-0.662115	1.73419e-41	-0.63215	6.93473e-37	0.60347	0	-0.175304	0.00157623	-0.0619366	0.270731	-0.204038	0.00021633	-0.283152	1.60663e-07	-0.0236141	0.675051	-0.0330086	0.557765	-0.0101281	0.857336	0.0566495	0.313912
1O8A	A	-0.699684	3.48738e-81	-0.602778	4.09145e-55	-0.693889	2.47529e-79	-0.595873	1.37129e-53	0.669167	0	-0.392621	3.09903e-23	-0.0922909	0.0310967	-0.405747	5.39918e-25	-0.272723	4.30095e-11	0.167137	8.0476e-05	0.0210129	0.624943	0.173599	4.1303e-05	0.180567	1.95404e-05
1O98	A	-0.757008	4.72671e-87	-0.691898	4.51909e-67	-0.753027	1.18472e-85	-0.682463	1.30456e-64	0.648464	0	-0.315666	1.02323e-12	-0.0790832	0.0892016	-0.338431	1.30517e-14	-0.391075	8.74531e-20	0.0728472	0.117617	-0.0155599	0.738832	0.0850237	0.0675207	0.0195887	0.674665
1OG1	A	-0.687283	2.79177e-30	-0.628717	3.57155e-24	-0.694105	4.35912e-31	-0.617849	3.52018e-23	0.642511	0	-0.277631	3.66521e-05	0.00804755	0.908488	-0.301601	6.23937e-06	-0.257796	0.000138473	-0.00252337	0.97125	-0.0974116	0.162124	0.0185031	0.791532	0.0831937	0.233114
1OGO	X	-0.426979	3.1006e-24	-0.420244	1.87447e-23	-0.431789	8.36441e-25	-0.417242	4.12545e-23	0.338943	2.66454e-15	-0.0864789	0.0495124	0.0216683	0.623842	-0.0968221	0.0277236	-0.260701	9.9451e-10	-0.0421002	0.340354	-0.0678291	0.123965	-0.0339816	0.44168	-0.0231587	0.600167
1OJ4	A	-0.71256	4.80583e-40	-0.659487	1.39372e-32	-0.718579	5.33875e-41	-0.647218	4.55816e-31	0.623013	0	-0.270775	9.83743e-06	0.0223425	0.725418	-0.301148	6.92999e-07	-0.348461	5.136e-09	0.022386	0.724905	-0.0954643	0.131753	0.0428904	0.499869	0.042771	0.501065
1ONR	A	-0.773875	1.81774e-60	-0.724156	1.57895e-49	-0.77618	4.84316e-61	-0.721674	4.80313e-49	0.732686	0	-0.274658	9.69325e-07	-0.0109891	0.850535	-0.282086	4.61871e-07	-0.284888	3.46946e-07	0.0309303	0.595697	-0.0607744	0.296489	0.0387617	0.505971	0.138225	0.0167093
1OPM	A	-0.51953	4.92893e-21	-0.475133	2.12149e-17	-0.511472	2.46717e-20	-0.480708	7.92181e-18	0.478967	0	-0.211557	0.000285111	-0.100317	0.0909992	-0.197074	0.00075265	-0.214593	0.000230466	0.024428	0.682092	0.0419081	0.481978	0.00269111	0.964018	0.074488	0.210525
1OXA	A	-0.45792	8.74215e-21	-0.412677	8.21103e-17	-0.443942	1.71018e-19	-0.425778	6.67789e-18	0.467604	0	-0.203317	6.34228e-05	-0.16934	0.000934585	-0.168616	0.000984377	-0.11975	0.0201648	0.044154	0.394605	0.126768	0.0138326	0.00525889	0.919316	0.152655	0.00292791
1OYG	A	-0.693777	2.03125e-59	-0.684252	3.16816e-57	-0.693101	2.92578e-59	-0.680873	1.8141e-56	0.608665	0	-0.140099	0.00455468	-0.0424626	0.394135	-0.152224	0.00201464	-0.336151	8.29144e-13	-0.080631	0.104819	-0.0294178	0.555137	-0.0737114	0.138356	0.0463051	0.352676
1P1X	A	-0.656424	5.60255e-30	-0.601807	3.01212e-24	-0.663339	8.64016e-31	-0.590771	3.21223e-23	0.613973	0	-0.262335	3.88986e-05	0.0384687	0.560184	-0.288878	4.96667e-06	-0.246713	0.000116906	0.00995015	0.880307	-0.102986	0.117162	0.0396055	0.548632	0.0832959	0.20591
1P3D	A	-0.697059	3.40475e-60	-0.627955	8.32648e-46	-0.69786	2.19484e-60	-0.614856	1.78041e-43	0.584363	0	-0.317661	1.85509e-11	-0.0348371	0.48461	-0.350303	6.44516e-14	-0.382083	1.13537e-16	0.0966622	0.0515119	-0.0482674	0.332601	0.121936	0.0137708	0.0396933	0.425756
1P5D	X	-0.721363	9.18994e-67	-0.684882	8.79603e-58	-0.727762	1.73148e-68	-0.663755	3.68347e-53	0.582881	0	-0.227493	2.58282e-06	-0.00405461	0.934966	-0.283163	2.82046e-09	-0.425102	3.33928e-21	-0.021259	0.668705	-0.0963799	0.0513337	0.0196965	0.691765	-0.00986657	0.842599
1PA9	A	-0.607409	2.08763e-27	-0.611505	7.50321e-28	-0.622303	4.69925e-29	-0.596571	2.91736e-26	0.514933	0	-0.101593	0.102944	0.10307	0.0979822	-0.14109	0.0228581	-0.323977	4.54011e-08	-0.123749	0.0464356	-0.170115	0.00583867	-0.082816	0.184501	-0.034231	0.584416
1PII	A	-0.701643	2.3068e-63	-0.61728	2.30077e-45	-0.715402	6.43774e-67	-0.59531	1.56043e-41	0.726091	0	-0.359209	4.14662e-15	0.0620017	0.205145	-0.410719	4.01104e-20	-0.174382	0.000303789	0.133278	0.00609143	-0.152778	0.0016155	0.175445	0.000278232	0.255568	6.9821e-08
1PKN	A	-0.552134	1.06507e-38	-0.523497	2.73837e-34	-0.547287	6.36621e-38	-0.52934	3.72921e-35	0.463035	0	-0.175724	0.000118517	-0.0809478	0.0798951	-0.157482	0.000584216	-0.302263	8.04213e-12	0.00873827	0.850533	0.0349835	0.450344	-0.0122418	0.79178	0.0302105	0.51456
1PMI	A	-0.74113	1.98275e-72	-0.689151	6.63229e-59	-0.746549	5.0012e-74	-0.668534	2.66027e-54	0.596527	0	-0.274146	9.24959e-09	0.00896497	0.856645	-0.327756	2.7444e-12	-0.441989	3.13731e-23	0.0284813	0.56589	-0.0902335	0.0679104	0.0713286	0.149613	-0.0438703	0.376257
1PP4	A	-0.669956	2.49911e-28	-0.609665	1.86075e-22	-0.651301	2.27665e-26	-0.621109	1.78861e-23	0.637865	0	-0.279108	3.30398e-05	-0.186447	0.00671757	-0.251185	0.000210161	-0.233489	0.000604264	0.0274063	0.695363	0.100571	0.148805	-0.00542574	0.938229	0.112017	0.107385
1PS9	A	-0.674757	2.50157e-81	-0.625215	1.03605e-66	-0.666964	7.66935e-79	-0.630288	4.36765e-68	0.631878	0	-0.260509	3.85978e-11	-0.11252	0.00554088	-0.243858	7.31016e-10	-0.290806	9.69228e-14	0.058836	0.148828	0.0469494	0.249613	0.0378389	0.353654	0.168939	2.68701e-05
1PTD	A	-0.658865	5.47131e-36	-0.616787	1.57504e-30	-0.652105	4.71753e-35	-0.618132	1.08524e-30	0.524119	0	-0.231916	7.69582e-05	-0.0977162	0.103476	-0.229095	9.50393e-05	-0.413481	5.04617e-14	-0.0104168	0.862846	0.026211	0.6637	-0.0216525	0.719482	-0.10754	0.0728534
1PUD	A	-0.553809	1.76482e-28	-0.483286	3.98442e-21	-0.560882	2.56614e-29	-0.479778	8.38279e-21	0.521079	0	-0.287118	4.30338e-08	0.0337826	0.536739	-0.297027	1.30858e-08	-0.214043	6.21277e-05	0.0964241	0.0766499	-0.0950033	0.081135	0.108202	0.0466859	0.103118	0.0581384
1PYL	A	-0.524685	3.00431e-07	-0.414522	8.85027e-05	-0.521977	3.54266e-07	-0.412783	9.53859e-05	0.480893	3.65505e-06	-0.341662	0.00106846	-0.0635424	0.566618	-0.33591	0.00132876	-0.21016	0.0530337	0.115185	0.296664	-0.0346861	0.754765	0.0890597	0.420973	0.0114416	0.917978
1Q91	A	-0.644737	6.93972e-23	-0.595212	6.3504e-19	-0.642172	1.15989e-22	-0.590714	1.34684e-18	0.517269	6.52811e-14	-0.247848	0.000598447	-0.0594248	0.424477	-0.258348	0.000333353	-0.395239	7.80093e-09	-0.0044117	0.952801	-0.0151889	0.838506	0.000852222	0.990877	-0.0899712	0.22551
1QAM	A	-0.468481	8.74256e-14	-0.490015	4.10625e-15	-0.480812	1.55789e-14	-0.468081	9.23533e-14	0.385601	1.83595e-09	-0.054047	0.417891	0.0841649	0.206176	-0.104018	0.117513	-0.271121	2.49051e-05	-0.153496	0.020079	-0.137071	0.0383547	-0.102201	0.124133	-0.0521505	0.434461
1QAZ	A	-0.287024	1.27803e-07	-0.26419	1.26325e-06	-0.292735	6.97306e-08	-0.263124	1.39881e-06	0.313485	6.88218e-09	-0.114194	0.0385441	0.0348154	0.530622	-0.11647	0.0347871	-0.0289139	0.602599	0.0213039	0.701307	-0.0672537	0.22501	0.0204132	0.713236	0.129329	0.0188924
1QBA	A	-0.666446	8.11024e-102	-0.625157	3.11605e-86	-0.669771	3.50174e-103	-0.621764	4.69041e-85	0.631142	0	-0.234718	1.49866e-11	0.00339055	0.92451	-0.244335	1.89897e-12	-0.279403	4.21656e-16	0.041989	0.240204	-0.066738	0.0615878	0.0462541	0.195659	0.179598	3.35975e-07
1QFM	A	-0.647598	4.54641e-78	-0.609954	4.40726e-67	-0.65344	6.47041e-80	-0.601018	1.09589e-64	0.626172	0	-0.217711	1.5471e-08	0.019779	0.615919	-0.242316	2.40027e-10	-0.241237	2.91329e-10	0.00767556	0.845676	-0.0894005	0.022841	0.0236053	0.549348	0.175794	5.94841e-06
1QGX	A	-0.705741	5.64327e-50	-0.664097	1.90969e-42	-0.70675	3.56993e-50	-0.658517	1.58057e-41	0.618975	0	-0.239262	1.04292e-05	-0.0296399	0.595802	-0.254483	2.51e-06	-0.339339	1.09523e-10	0.0141559	0.800072	-0.0480013	0.389974	0.0183355	0.742874	0.0145094	0.795188
1QJE	A	-0.578992	7.09931e-29	-0.524853	3.92924e-23	-0.580224	5.10305e-29	-0.522719	6.31045e-23	0.51092	0	-0.247489	8.44179e-06	-0.0169243	0.767896	-0.251996	5.6194e-06	-0.273041	7.47245e-07	0.0385917	0.500711	-0.0414126	0.46988	0.0387998	0.498401	0.0189416	0.74116
1QK2	A	-0.667396	5.00636e-44	-0.570631	5.47995e-30	-0.659016	1.32637e-42	-0.569333	7.8774e-30	0.610737	0	-0.374898	2.40958e-13	-0.111692	0.041795	-0.374039	2.78626e-13	-0.277738	1.64055e-07	0.144055	0.00837795	0.0368723	0.50398	0.136487	0.0125876	0.0687113	0.212264
1QWN	A	-0.631576	5.32612e-107	-0.612552	4.98815e-99	-0.633095	1.16293e-107	-0.611857	9.5199e-99	0.542869	0	-0.154822	1.39936e-06	-0.00752575	0.816754	-0.15771	8.77115e-07	-0.328024	1.11795e-26	-0.017364	0.592849	-0.0444775	0.170437	-0.0188153	0.562308	0.058472	0.0713228
1R1J	A	-0.625867	2.077e-72	-0.550355	4.66206e-53	-0.614285	4.26315e-69	-0.54935	7.82632e-53	0.569678	0	-0.311375	6.25889e-17	-0.136573	0.00043551	-0.309503	1.00105e-16	-0.281528	7.10605e-14	0.0901988	0.0208431	0.0654879	0.0940325	0.076611	0.0499411	0.109919	0.00477756
1R44	A	-0.756988	7.66661e-36	-0.679634	1.49e-26	-0.763786	7.97076e-37	-0.653044	5.47388e-24	0.701725	0	-0.333457	1.71179e-06	-0.00276388	0.970175	-0.386718	1.40494e-08	-0.291867	3.65861e-05	0.00807489	0.913013	-0.101712	0.166631	0.0546551	0.459017	0.0676242	0.359194
1R4Z	A	-0.641149	4.37023e-19	-0.535501	9.89505e-13	-0.637917	7.44632e-19	-0.544227	3.57009e-13	0.535129	1.03295e-12	-0.369496	1.11588e-06	-0.0670086	0.410774	-0.348741	5.18167e-06	-0.35831	2.59542e-06	0.110528	0.173189	-0.0188961	0.816949	0.0820418	0.313358	-0.0606402	0.456842
1RBN	A	-0.653274	8.11793e-16	-0.515242	2.02639e-09	-0.64688	1.90255e-15	-0.516895	1.76331e-09	0.654657	6.66134e-16	-0.43751	1.60334e-07	-0.0920988	0.319169	-0.424671	4.37131e-07	-0.129968	0.158017	0.173561	0.0576809	0.0130182	0.888485	0.144083	0.116839	0.13675	0.137066
1RDD	A	-0.456573	1.61276e-08	-0.367637	8.5009e-06	-0.447138	3.42624e-08	-0.371977	6.519e-06	0.476963	2.92123e-09	-0.295619	0.000307657	-0.0927451	0.277361	-0.278356	0.000725547	-0.0891731	0.296445	0.118695	0.163297	0.0086682	0.919478	0.0859691	0.314276	0.164276	0.0521175
1RU4	A	-0.53844	7.49021e-28	-0.515956	2.44723e-25	-0.512501	5.73634e-25	-0.530122	6.70727e-27	0.466968	0	-0.160961	0.00231344	-0.201349	0.000122956	-0.128978	0.0151067	-0.269792	1.65678e-07	-0.0469152	0.380262	0.115243	0.0302074	-0.0880183	0.0987951	0.0304821	0.56887
1S3I	A	-0.553077	2.3542e-23	-0.521925	1.5116e-20	-0.542107	2.47702e-22	-0.525928	6.83441e-21	0.411002	1.36202e-12	-0.186387	0.00178996	-0.123974	0.0397117	-0.17854	0.002816	-0.378646	1.64193e-11	-0.03538	0.560032	0.0579249	0.339492	-0.0508252	0.402159	-0.0800121	0.186368
1S95	A	-0.659466	1.92544e-38	-0.581986	2.55238e-28	-0.660275	1.45543e-38	-0.577907	7.35579e-28	0.572191	0	-0.32	6.9811e-09	-0.0330605	0.570592	-0.328662	2.4186e-09	-0.327882	2.66549e-09	0.0788158	0.175218	-0.0464708	0.425062	0.0842598	0.147083	-0.00359981	0.950782
1SCA	A	-0.768102	2.15662e-47	-0.69045	6.69787e-35	-0.753037	1.31057e-44	-0.698925	4.56378e-36	0.695314	0	-0.351739	9.03749e-09	-0.176467	0.00609789	-0.326804	1.22603e-07	-0.330883	8.15534e-08	0.10228	0.115759	0.0906899	0.163611	0.072914	0.263419	0.0544419	0.404259
1SLL	A	-0.484129	3.19273e-37	-0.465063	4.08128e-34	-0.490563	2.5752e-38	-0.458813	3.86655e-33	0.389902	0	-0.134563	0.000812588	0.0404086	0.31867	-0.154972	0.000109743	-0.287694	1.29187e-13	-0.003232	0.936481	-0.0889058	0.0277414	0.0120561	0.76624	0.020264	0.61724
1SML	A	-0.532289	4.9232e-19	-0.492085	4.2184e-16	-0.538602	1.56792e-19	-0.480359	2.57222e-15	0.484892	1.33227e-15	-0.203785	0.00132169	0.0253322	0.695847	-0.232952	0.000219471	-0.220665	0.000482485	0.0185625	0.774558	-0.0860403	0.18276	0.0409934	0.526768	0.0219543	0.734779
1SNZ	A	-0.624896	1.17605e-34	-0.493212	3.17434e-20	-0.628207	4.12851e-35	-0.47711	7.39907e-19	0.606259	0	-0.434198	4.31359e-17	-0.0109822	0.848139	-0.466793	3.48121e-20	-0.198413	0.000416143	0.203201	0.0002964	-0.0653418	0.253573	0.234594	2.57975e-05	0.128149	0.0242636
1TAH	B	-0.515179	1.61524e-20	-0.494542	8.43708e-19	-0.517219	1.07632e-20	-0.494025	9.28482e-19	0.469901	0	-0.147305	0.0128604	-0.0143941	0.809979	-0.150005	0.0112689	-0.212561	0.000279592	-0.0293495	0.623819	-0.0481034	0.421156	-0.0339534	0.570401	0.0240981	0.687217
1TLP	E	-0.71337	1.61471e-44	-0.626051	1.1662e-31	-0.704839	4.69782e-43	-0.633042	1.54174e-32	0.666272	0	-0.355319	2.90736e-10	-0.113341	0.0585255	-0.336823	2.98885e-09	-0.270098	3.2878e-06	0.0964039	0.108239	0.027332	0.650247	0.0727686	0.226303	0.0892987	0.13707
1U3F	A	-0.551015	9.10797e-14	-0.486583	1.19273e-10	-0.532401	8.4805e-13	-0.490446	8.08129e-11	0.502304	2.37259e-11	-0.264029	0.000709175	-0.169993	0.0328633	-0.252304	0.00125896	-0.227712	0.0038202	0.0534453	0.507953	0.0934361	0.245715	0.0240292	0.76623	0.0233279	0.772866
1U5U	A	-0.356951	1.18251e-11	-0.361618	6.09169e-12	-0.355554	1.43905e-11	-0.353954	1.80001e-11	0.317443	2.13258e-09	-0.0502726	0.355459	-0.0326264	0.549	-0.0734262	0.176511	-0.165177	0.00210878	-0.0766901	0.157949	-0.00833938	0.878323	-0.0571067	0.293693	0.0252899	0.642355
1UAS	A	-0.709511	3.51793e-51	-0.640679	4.56914e-39	-0.69922	3.77705e-49	-0.641802	3.06848e-39	0.620918	0	-0.31118	3.98618e-09	-0.122988	0.0259289	-0.305372	8.23825e-09	-0.344793	4.07029e-11	0.0624205	0.261002	0.0250635	0.652287	0.0419052	0.450975	0.0318514	0.566827
1UN1	A	-0.625948	3.64174e-28	-0.568301	1.9236e-22	-0.618312	2.44262e-27	-0.568166	1.97782e-22	0.601624	0	-0.264334	1.93267e-05	-0.0997103	0.118261	-0.263441	2.07177e-05	-0.194146	0.00203459	0.0320543	0.617121	0.0209974	0.743374	0.0200752	0.754277	0.0885045	0.166027
1VID	A	-0.654663	1.73916e-25	-0.582226	2.8677e-19	-0.653887	2.07011e-25	-0.568788	2.79762e-18	0.588661	0	-0.304515	8.47267e-06	-0.0477124	0.505849	-0.334831	7.4466e-07	-0.286572	3.09683e-05	0.055972	0.434906	-0.0355166	0.6206	0.0839516	0.240614	0.00783662	0.91308
1VLB	A	-0.598257	2.11129e-79	-0.548448	1.737e-64	-0.597961	2.63545e-79	-0.547196	3.82841e-64	0.548852	0	-0.261793	1.51117e-14	-0.0298276	0.397771	-0.263983	8.78814e-15	-0.268306	2.96295e-15	0.106863	0.00232193	-0.0231556	0.511605	0.105825	0.00256374	0.123757	0.000409148
1VNC	A	-0.544512	2.53856e-42	-0.527506	2.27516e-39	-0.53197	3.96419e-40	-0.535238	1.08485e-40	0.484157	0	-0.136951	0.00148902	-0.152676	0.000385445	-0.1139	0.00842929	-0.255413	1.27686e-09	-0.0229112	0.598473	0.0990416	0.0221931	-0.054409	0.210541	0.0561319	0.196409
1VQ1	A	-0.621026	6.97394e-27	-0.547536	4.27268e-20	-0.626702	1.74948e-27	-0.528725	1.2952e-18	0.525202	0	-0.301991	1.13596e-06	0.0110893	0.864722	-0.342952	2.03886e-08	-0.334271	5.07712e-08	0.0729452	0.261184	-0.0848804	0.190643	0.107205	0.097628	0.0435966	0.502615
1W0H	A	-0.694219	1.20203e-27	-0.655941	6.94069e-24	-0.701313	2.07579e-28	-0.631993	8.49678e-22	0.638394	0	-0.234114	0.00123465	0.0101223	0.89197	-0.2874	5.68007e-05	-0.279062	9.66285e-05	-0.0559293	0.452324	-0.100016	0.177459	-0.00864285	0.907684	0.0590136	0.4277
1XQW	A	-0.646515	7.07303e-33	-0.586945	5.08532e-26	-0.645026	1.09559e-32	-0.579943	2.63926e-25	0.637951	0	-0.275105	3.47541e-06	-0.0520327	0.398126	-0.291044	8.07607e-07	-0.193397	0.00138998	0.0469669	0.445751	-0.028014	0.649477	0.055319	0.36892	0.162488	0.00757158
1Y9M	A	-0.704951	1.10405e-71	-0.665207	3.09771e-61	-0.700315	2.24236e-70	-0.664234	5.32831e-61	0.60364	0	-0.233401	2.20053e-07	-0.0808284	0.0800193	-0.236146	1.5538e-07	-0.364408	2.98068e-17	0.00453981	0.921931	0.00429379	0.926149	-0.00407545	0.929895	0.0147716	0.749796
1YON	A	-0.706075	1.64619e-42	-0.641552	4.64844e-33	-0.701631	8.88756e-42	-0.640443	6.45773e-33	0.60114	0	-0.297097	3.1767e-07	-0.0793686	0.190776	-0.298693	2.70669e-07	-0.370646	5.47564e-11	0.036255	0.551094	0.00659192	0.913743	0.0290438	0.633049	-0.0143582	0.813468
1YSC	A	-0.679913	1.5049e-53	-0.63558	5.89215e-45	-0.670437	1.37892e-51	-0.641031	6.16498e-46	0.640579	0	-0.241865	1.10551e-06	-0.124855	0.0139126	-0.226837	5.30995e-06	-0.263435	9.43328e-08	0.013356	0.794043	0.0528426	0.301022	-0.00965749	0.850279	0.132128	0.00918033
1ZE1	A	-0.501573	1.9507e-19	-0.452656	1.0596e-15	-0.500292	2.4877e-19	-0.448535	2.05742e-15	0.374958	7.06641e-11	-0.217358	0.000194404	-0.0409156	0.493203	-0.225943	0.000103979	-0.340846	1.30541e-09	0.0237884	0.690505	-0.0197713	0.740719	0.0256504	0.667665	-0.0720691	0.226628
1ZIO	A	-0.694479	4.08489e-29	-0.597514	4.60505e-20	-0.693172	5.71486e-29	-0.578612	1.22056e-18	0.640929	0	-0.36403	7.14643e-08	-0.0581795	0.421796	-0.402424	1.36689e-09	-0.273145	9.08238e-05	0.0850823	0.239177	-0.0396418	0.584479	0.120149	0.0952713	0.0556577	0.442261
206L	A	-0.613207	9.3357e-17	-0.490505	2.1525e-10	-0.611464	1.20323e-16	-0.478849	6.52009e-10	0.600541	4.44089e-16	-0.375287	9.97229e-07	-0.0568414	0.491497	-0.390366	3.00255e-07	-0.17704	0.0297413	0.0735708	0.372728	-0.0331122	0.688924	0.0752297	0.361986	0.126375	0.123721
2A0N	A	-0.590681	9.67248e-23	-0.54224	9.45332e-19	-0.584536	3.38005e-22	-0.53717	2.27412e-18	0.496777	1.55431e-15	-0.235455	0.000287946	-0.0880783	0.185709	-0.247965	0.000127702	-0.31973	4.40914e-07	0.0236269	0.723554	0.0231472	0.728946	0.0336691	0.614121	0.0104993	0.875128
2ABK	A	-0.599282	8.68908e-21	-0.559417	8.81619e-18	-0.597127	1.2948e-20	-0.543655	1.06253e-16	0.548351	0	-0.216811	0.0018752	-0.0530642	0.456909	-0.252149	0.000264328	-0.248038	0.000337654	-0.0285597	0.689158	-0.0154361	0.828886	-0.00133503	0.985088	0.0554373	0.436971
2ACY	A	-0.514416	4.05062e-07	-0.406456	0.000103087	-0.507233	6.22701e-07	-0.402227	0.000123541	0.493111	1.41011e-06	-0.320262	0.00207033	-0.0856952	0.433273	-0.328168	0.00155064	-0.156609	0.148571	0.0561305	0.608525	-0.00226941	0.983505	0.0696918	0.52447	0.0553217	0.613715
2AYH	A	-0.664588	4.53926e-25	-0.593276	4.54859e-19	-0.663074	6.33067e-25	-0.59953	1.55173e-19	0.622153	0	-0.3005	2.02533e-05	-0.0541562	0.463139	-0.286789	5.12767e-05	-0.23971	0.000837441	0.0244903	0.740344	-0.0303987	0.680767	0.00276469	0.970166	0.0534666	0.46887
2CPO	A	-0.419122	2.97938e-13	-0.383892	3.41191e-11	-0.416976	4.04226e-13	-0.38868	1.85058e-11	0.356113	9.81505e-10	-0.169969	0.00423336	-0.0423664	0.481932	-0.157027	0.00837163	-0.221584	0.000164412	0.0244774	0.684718	-0.00017956	0.997624	0.008108	0.893038	-0.0158896	0.792141
2CPU	A	-0.707186	2.13963e-68	-0.626738	1.01243e-49	-0.702286	4.43898e-67	-0.621645	1.01482e-48	0.694933	0	-0.350424	4.22049e-15	-0.0832953	0.0795488	-0.361103	4.56219e-16	-0.22175	1.84015e-06	0.124442	0.00851938	-0.00564498	0.905741	0.129329	0.00622282	0.178867	0.000137046
2DLN	A	-0.765214	9.27473e-54	-0.720224	6.17602e-45	-0.751821	6.18413e-51	-0.727608	2.91373e-46	0.652299	0	-0.259269	1.02866e-05	-0.151107	0.0120125	-0.24142	4.3538e-05	-0.400098	7.31223e-13	-0.0197661	0.745292	0.0501545	0.40928	-0.0463091	0.446207	0.0045247	0.940732
2EBN	A	-0.476228	2.08539e-16	-0.455823	5.31263e-15	-0.495756	7.63581e-18	-0.438362	7.18221e-14	0.418681	1.13642e-12	-0.142998	0.0193531	0.105149	0.086995	-0.186133	0.00216638	-0.227037	0.000160998	-0.0378146	0.540193	-0.173311	0.00439414	0.00372037	0.951981	-0.00684016	0.911838
2ENG	A	-0.606008	1.99285e-19	-0.513599	1.66901e-13	-0.606724	1.76164e-19	-0.516643	1.13496e-13	0.566618	0	-0.338337	1.72367e-06	-0.0351559	0.639779	-0.328174	3.79968e-06	-0.223579	0.00227487	0.104929	0.160395	-0.0458689	0.541273	0.0858625	0.251563	0.0616202	0.411439
2F61	A	-0.672072	7.08701e-62	-0.627915	6.35796e-52	-0.674365	1.93232e-62	-0.611308	1.39629e-48	0.578006	0	-0.240379	1.15981e-07	-0.0240072	0.607305	-0.284222	2.23501e-10	-0.344036	4.4575e-15	0.0194561	0.677075	-0.0605343	0.194331	0.0529024	0.2569	0.0277577	0.552331
2F9R	A	-0.618144	1.38354e-28	-0.527325	7.21545e-20	-0.63184	3.71243e-30	-0.498532	1.29171e-17	0.577357	0	-0.347635	3.20866e-09	0.0903201	0.147557	-0.414957	3.26568e-13	-0.232932	0.000130861	0.129693	0.0367371	-0.158991	0.0101231	0.196524	0.0013712	0.0741425	0.235137
2NLR	A	-0.594814	3.84145e-20	-0.563031	8.72648e-18	-0.604488	6.52336e-21	-0.560334	1.34684e-17	0.509473	2.42029e-14	-0.200971	0.00437011	0.0318363	0.658122	-0.208043	0.00312789	-0.307751	7.00646e-06	-0.059917	0.404342	-0.112318	0.116344	-0.0587614	0.413499	-0.0216774	0.763244
2NMT	A	-0.550391	4.68282e-33	-0.495255	3.83063e-26	-0.554951	1.09624e-33	-0.491736	9.61819e-26	0.548981	0	-0.255649	1.37271e-07	0.0171945	0.731863	-0.262024	6.30909e-08	-0.184084	0.000190248	0.0877699	0.0791604	-0.0730419	0.144497	0.0867801	0.0826293	0.179823	0.00027019
2PEC	A	-0.526987	9.10069e-24	-0.529464	5.15123e-24	-0.512189	2.47646e-22	-0.537233	8.38644e-25	0.481458	0	-0.0898456	0.112214	-0.146214	0.00925924	-0.0788295	0.163841	-0.218637	7.98173e-05	-0.103391	0.0672212	0.0774677	0.17129	-0.130837	0.0201468	0.0434653	0.44367
2PIA	A	-0.724241	2.20779e-49	-0.64978	6.79776e-37	-0.717039	5.33197e-48	-0.64893	9.01083e-37	0.640691	0	-0.326271	3.45931e-09	-0.106932	0.0656309	-0.327434	2.99695e-09	-0.346856	2.44842e-10	0.0643563	0.269641	0.0324802	0.57803	0.0616331	0.290512	0.0791736	0.173988
2PTH	A	-0.458052	3.37242e-10	-0.444631	1.24527e-09	-0.452353	5.9138e-10	-0.445069	1.19433e-09	0.420337	1.1521e-08	-0.127624	0.0963399	-0.0738382	0.338662	-0.127959	0.0954559	-0.182363	0.0165369	-0.0645964	0.402864	0.0162281	0.83387	-0.0681769	0.377186	0.0112881	0.884014
2SQC	A	-0.681856	8.33722e-78	-0.638344	2.02178e-65	-0.687205	1.7687e-79	-0.62677	1.86915e-62	0.611596	0	-0.241974	3.96399e-09	0.00736848	0.861938	-0.27428	1.68057e-11	-0.312461	8.29218e-15	0.0332744	0.432021	-0.0858973	0.0418742	0.0560575	0.185142	0.0821853	0.0516275
2THI	A	-0.497188	1.9187e-22	-0.464826	1.81669e-19	-0.489533	1.03704e-21	-0.463089	2.57209e-19	0.447935	0	-0.176444	0.00105275	-0.0947465	0.0819678	-0.181039	0.000767689	-0.221482	3.31288e-05	0.000883068	0.987124	0.0377362	0.490102	-0.00558799	0.918657	0.0500431	0.359815
2TPS	A	-0.717425	4.49069e-33	-0.619772	1.02658e-22	-0.721069	1.51667e-33	-0.59183	2.20426e-20	0.626614	0	-0.381032	6.66871e-09	-0.0131807	0.852849	-0.441302	4.51817e-12	-0.352488	1.15719e-07	0.120846	0.0867116	-0.0735889	0.299129	0.174102	0.0128525	-0.046847	0.509305
5EAT	A	-0.33192	1.16881e-14	-0.277169	1.6806e-10	-0.340226	2.28555e-15	-0.278462	1.37151e-10	0.431605	0	-0.218506	4.26436e-07	0.0796048	0.0713172	-0.212829	8.69663e-07	0.0376222	0.395197	0.119988	0.00634453	-0.109177	0.0131236	0.112544	0.0105322	0.278438	5.87382e-11
7ATJ	A	-0.707824	8.9536e-45	-0.603262	9.77183e-30	-0.69946	2.48236e-43	-0.60385	8.32985e-30	0.753601	0	-0.397662	3.07712e-13	-0.113623	0.0543684	-0.391494	8.23238e-13	-0.121885	0.0388448	0.145071	0.0136417	0.0337646	0.569809	0.129956	0.0274616	0.28593	5.17663e-07
